# Supplementary material for: Comparative Genomics of Acinetobacter baumannii Clinical Strains From Brazil Reveals Polyclonal Dissemination and Selective Exchange of Mobile Genetic Elements Associated With Resistance Genes
Source: Front Microbiol. 2020 Jun 17;11:1176. doi: 10.3389/fmicb.2020.01176 (PMC7326025; doi:10.3389/fmicb.2020.01176)
Supplement: TABLE S7 — Summary of the gene identification data for the OC and K antigen gene clusters for the various sequenced Acinetobacter strains with definition of likely OCL and KL-types. The relevant output results from the Kaptive tool (Wick et al., 2018) using the curated databases of annotated reference sequences for A. baumannii K and OC loci (Wyres et al., 2020) were added to the table with the relevant OCL and KL-types listed, as shown also in Figure 4. [file Table_7.xlsx]

## Sheet: OCL and KL definition
Summary of the gene identification data for the OC and K antigen gene clusters
Order	ST	Strains	OCL	%cov / %id	genes / ref	KL	%cov / %id	genes / ref	Other genes found in locus / %id		Other genes found outside locus
1	1	Acb_45	OCL1	99.67 / 100.00	9-9	KL18	89.22 / 99.19	15-19
2	1	Acb_19	OCL1	99.67 / 100.00	9-9	KL18	97.84 / 99.27	17-19
3	1	Acb_13	OCL1	100 / 100	9-9	KL18	97.97 / 99.27	17-19
4	1	Acb_9	OCL1	100 / 100	9-9	KL18	99.53 / 99.29	17-19
5	1	Acb_16	OCL1	100 / 100	9-9	KL1	98.00 / 100	15-18
6	881	Acb_42	OCL1	100 / 100	9-9	KL15	100 / 99.72	19-22
7	881	Acb_40	OCL1	99.77 / 100	9-9	KL15	92.25 / 99.69	17-22
11	79	Acb_32	OCL10	98.43 / 98.95	7-11	KL42	85.33 / 94.59	16-20	KL22_14_gtr9	98.18	KL22_20_pgt1	100.00
12	79	Acb_30	OCL10	99.93 / 99.98	8-11	KL93	87.95 / 94.82	16-22	KL22_14_gtr9	98.18
13	79	Acb_39	OCL10	97.73 / 98.96	6-11	KL13	90.41 / 96.54	22-31	KL110_21_gtr31	100.00
14	79	Acb_6	OCL10	100 / 99.98	10-11	KL13	98.58 / 96.77	26-31	KL110_21_gtr31	100
15	79	Acb_23	OCL10	100 / 99.98	10-11	KL93	89.07 / 94.40	17-22	KL22_14_gtr9	99.18
16	79	Acb_28	OCL10	99.42 / 99.98	8-11	KL93	88.06 / 94.75	17-22	KL22_14_gtr9	99.18
17	79	Acb_22	OCL10	100 / 99.98	10-11	KL52	99.21 / 98.04	16-17
18	79	Acb_18	OCL10	100 / 99.98	10-11	KL52	100 / 98.06	16-17
19	79	Acb_17	OCL10	100 / 99.98	10-11	KL52	100 / 98.05	16-17
20	79	Acb_31	OCL10	98.47 / 98.95	8-11	KL52	91.45 / 97.64	16-17
21	79	Acb_26	OCL10	90.19 / 98.82	6-11	KL22	87.90 / 99.99	15-21
22	79	Acb_20	OCL10	90.86 / 99.97	9-11	KL22	98.81 / 99.98	20-21
23	79	Acb_15	OCL10	100 / 99.98	10-11	KL49	98.39 / 99.97	25-28
24	79	Acb_2	OCL10	100 / 99.96	8-11	KL9	97.76 / 98.81	18-21
35	15	Acb_14	OCL7	99.45 / 99.25	9-9	KL22	98.95 / 99.77	17-21
36	15	Acb_10	OCL7	100 / 99.23	8-9	KL22	97.43 / 99.96	20-21
37	15	Acb_37	OCL7	100 / 99.21	8-9	KL22	96.50 / 99.96	17-21
38	15	Acb_7	OCL7	100 / 99.23	9-9	KL22	99.93 / 99.95	19-21
39	15	Acb_12	OCL7	100 / 99.17	8-9	KL9	96.89 / 98.70	14-21	KL49_21_qnr1 - 98.98id / KL49_20_gtr20 - 99.02id / KL80_17_itrA3- 88.00id	98.98 / 99.02 / 88.00
40	15	Acb_3	OCL7	100 / 99.23	9-9	KL9	100 / 98.83	20-21
41	15	Acb_43	OCL7	94.86 / 99.26	6-9	KL22	90.43 / 99.96	14-21
42	15	Acb_25	OCL7	94.73 / 99.33	7-9	KL3	84.12 / 99.22	13-20
43	15	Acb_34	OCL7	100 / 99.18	7-9	KL22	96.93 / 99.96	18-21
44	15	Acb_46	OCL7	100 / 99.12	8-9	KL22	92.56 / 99.96	15-21
45	113	Acb_8	OCL7	99.70 / 98.2	6-9	KL124	72.17 / 87.17	9-18	KL118_06_ptr2	85.76
46	113	Acb_4	OCL7	100 / 98.78	9-9	KL10	100 / 99.27	21-23
47	113	Acb_44	OCL7	99.58 / 98.79	8-9	KL10	88.84 / 99.12	21-23
48	113	Acb_47	OCL7	96.68 / 98.78	7-9	KL10	97.74 / 99.24	16-13
49	113	Acb_24	OCL7	100 / 98.76	9-9	KL13	100 / 96.58	30-31
50	113	Acb_35	OCL7	99.47-98.79	9-9	KL2	96.95 / 96.00	19-22
51	113	Acb_5	OCL7	100 / 98.78	9-9	KL27	100 / 99.40	22-24
52	113	Acb_29	OCL7	99.44 / 98.72	8-9	KL27	95.16 / 99.51	20-24
53	113	Acb_33	OCL7	97.67 / 98.76	7-9	KL13	90.23 / 96.20	25-31
54	113	Acb_38	OCL7	96.68 / 98.83	7-9	KL13	92.94 / 96.36	23-31
55	113	Acb_1	OCL7	100 / 98.39	8-9	KL124	74.40 / 86.53	10-18
56	113	Acb_21	OCL7	100 / 98.77	9-9	KL13	100 / 96.45	29-31
57	113	Acb_36	OCL7	91.11 / 98.75	7-9	KL73	85.79 / 92.29	18-31	KL110_21_gtr31	100
58	25	Acb_41	OCL6	100 / 100	10-10	KL37	100 / 98.83	14-17			KL38_10_rmlD / KL38_09_rmlB / KL74_12_rmlC / KL114_11_rmlA	82.55 / 90.45 / 93.48 / 92.93
60		Acb_11	OCL7	75.47 / 90.83	5-9				A. nosocomialis
